# Supplementary material
Source: PubMed Central journal article supplement (PMC5582127)
Supplement: rsif20170316supp1.pdf [file rsif20170316supp1.pdf]

## Supplementary Material: “Finite Cell Size Effects on Protein Variability in Turing Patterned Tissues”

Vertex model simulations: supplementary movies S1-S4 show the dynamics of pattern formation ( $U$  species) under different conditions relative to a) the ratio between the pattern wavelength and the cell size, b) the pattern amplitude with respect to the average concentration as indicated, and c) the noise intensity used in simulations (see Materials and Methods). Cells' color is indicative of the protein concentration values and has been adjusted to better visualize the pattern domains in each case.

**Movie S1:**  $a = 0.9$ ,  $D_v = 9$  (Back circle in Fig. 2B), and  $\sigma_\xi = 0$

**Movie S2:**  $a = 0.9$ ,  $D_v = 9$  (Back circle in Fig. 2B), and  $\sigma_\xi = 0.1$

**Movie S3:**  $a = 0.2$ ,  $D_v = 40$  (White circle in Fig. 2B), and  $\sigma_\xi = 0$

**Movie S4:**  $a = 0.2$ ,  $D_v = 40$  (White circle in Fig. 2B), and  $\sigma_\xi = 0.1$
